# Supplementary material for: A Fungal Versatile GH10 Endoxylanase and Its Glycosynthase Variant: Synthesis of Xylooligosaccharides and Glycosides of Bioactive Phenolic Compounds
Source: MDPI journal article supplement (doi:10.3390/ijms23031383), 2022-01-26
Supplement: s1 [file s1]

## SUPPLEMENTARY INFORMATION

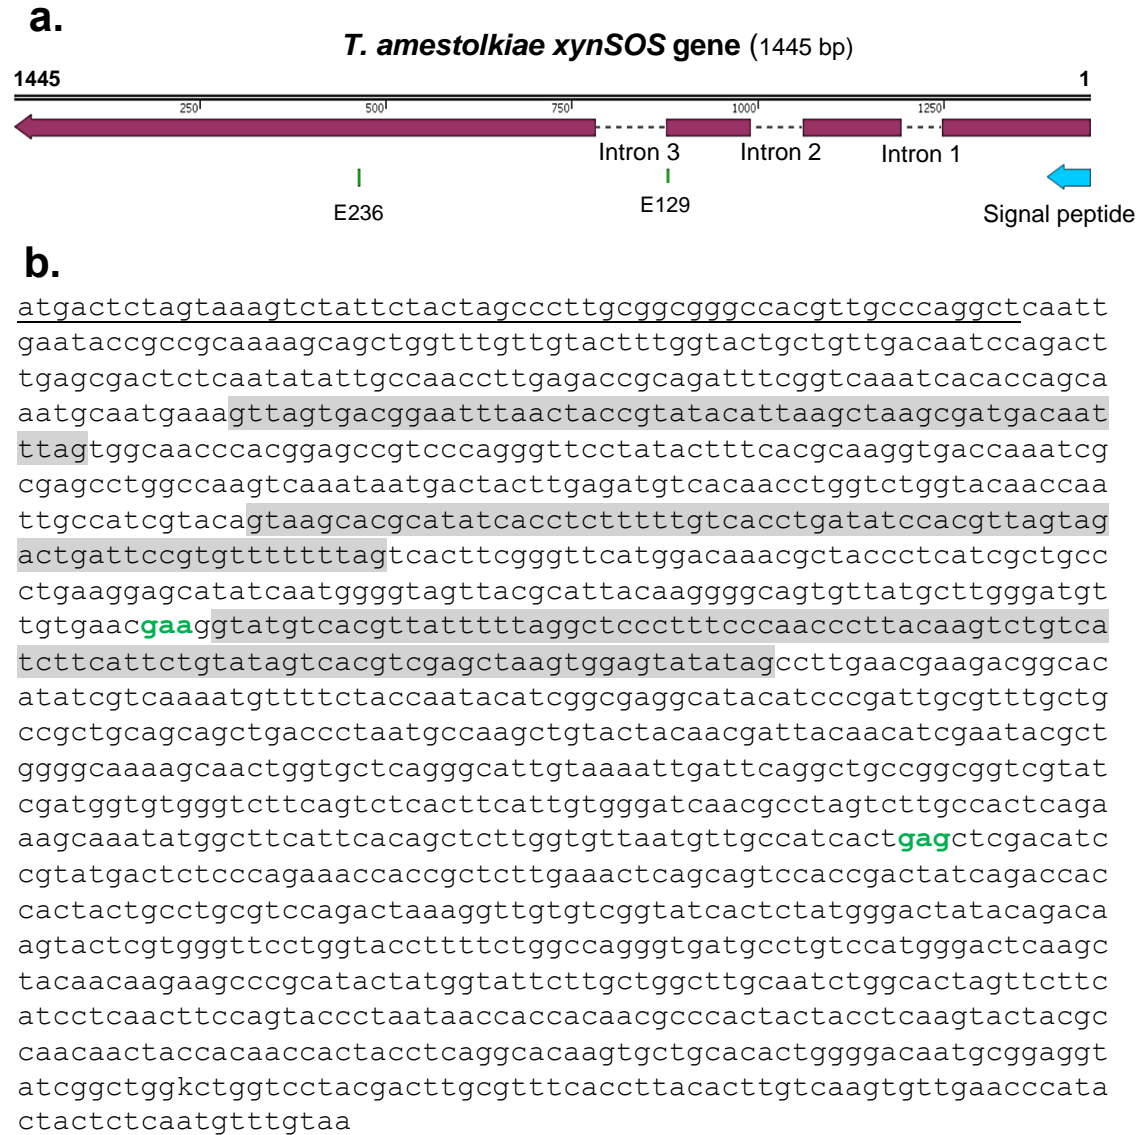

**Figure S1.** DNA sequence of *xynSOS* from *T. amestolkiae*. a) Scheme of *xynSOS* gene structure. The coding sequence is represented in purple, the introns in dot lines, the predicted signal peptide in blue and the codons of the acid/base (E129) and nucleophile (E236) catalytic residues in green. b) Sequence of *xynSOS* gene. Introns are indicated in grey, the predicted signal peptide is underlined and the codons of the acid/base (E129) and nucleophile (E236) catalytic residues are highlighted in green.

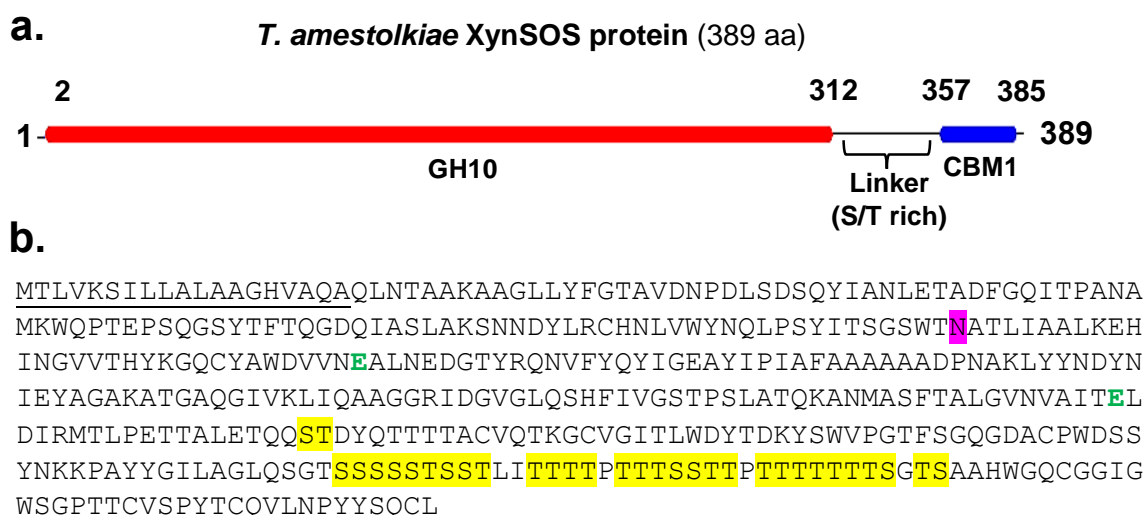

**Figure S2.** Protein sequence of XynSOS from *T. amestolkiae*. a) Prediction of CAZy and CBM domains conducted by the dbCAN2 server based on XynSOS amino acid sequence. The predicted GH10 domain is shown in red and the CBM1 domain in blue. In between the GH10 and CBM1 domains a rich Ser/Thr linker region can be found. b) Amino acid sequence of XynSOS. The predicted signal peptide is underlined and the acid/base (E129) and nucleophile (E236) catalytic residues are highlighted in green. Predicted N-glycosylation sites are indicated in pink and O-glycosylation sites in yellow.

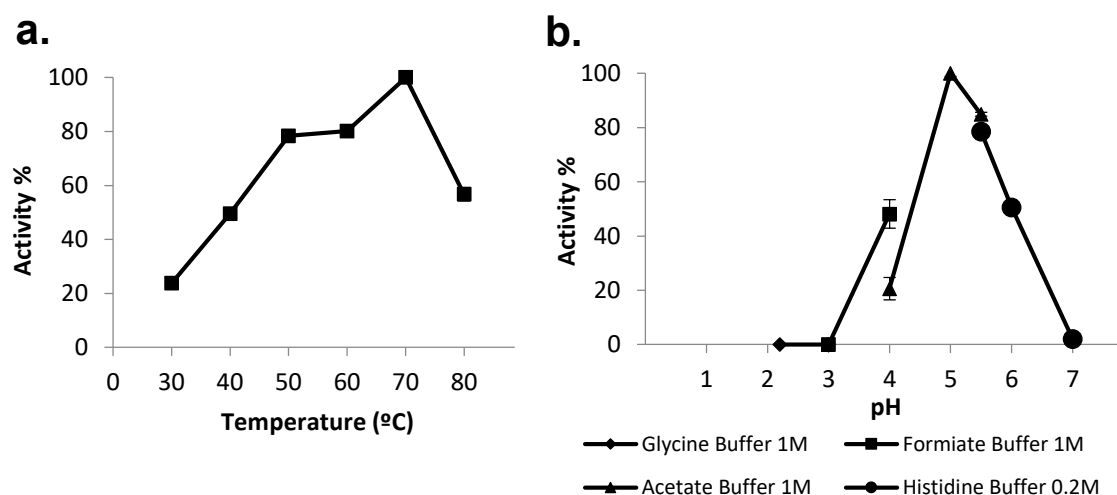

**Figure S3.** Optimal temperature a) and pH b) of rXynSOS determined with triplicate reactions (200  $\mu$ L) using 1% (w/v) AZCL-beechwood xylan as substrate and 0.1% BSA to prevent activity loss when working with low enzyme concentrations. The reactions were incubated at 1,200 rpm for 10 min, stopped by adding 500  $\mu$ L of 4% (w/v) Tris buffer pH 10, and centrifuged to remove the insoluble AZCL-xylan. The absorbance of the supernatants was measured at 590 nm. Optimal pH was evaluated on a range of 2.2 to 7 by using glycine-HCl (pH 2.2-3), sodium formate (pH 3-4), sodium acetate (pH 4-5.5), histidine-HCl (pH 5.5-7) buffers at a concentration of 50 mM and conducting the reactions at 50  $^{\circ}$ C. Optimal temperature was assayed in reactions with the substrate in 50 mM sodium acetate buffer pH 5 at temperatures varying from 30 to 80  $^{\circ}$ C.

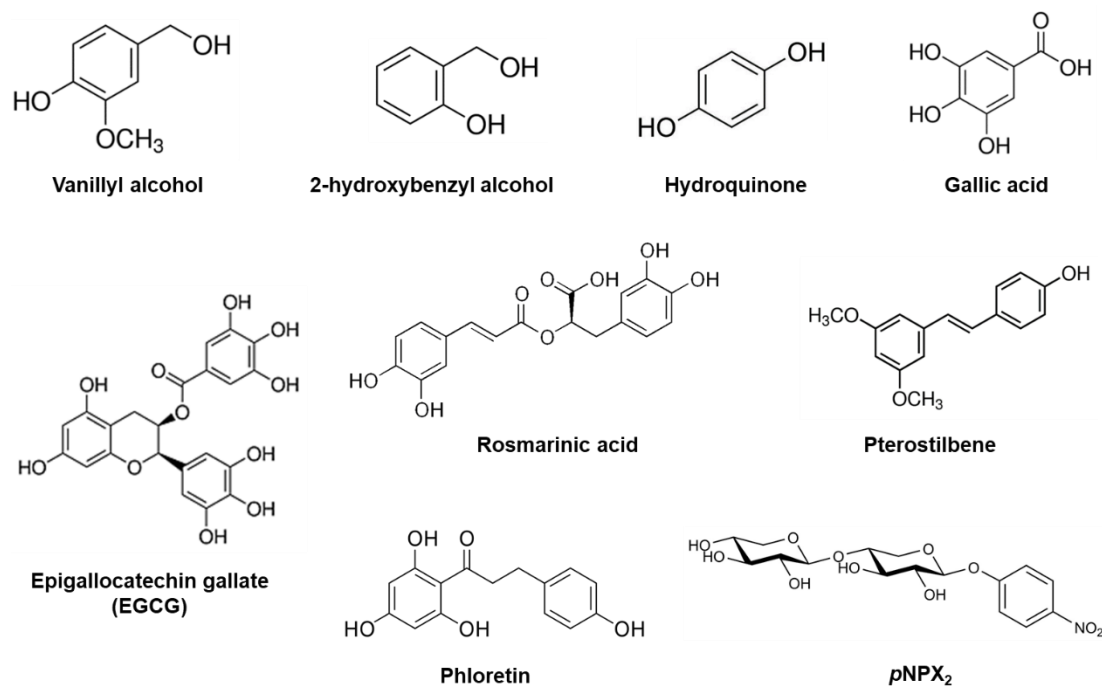

**Figure S4.** Molecular structure of the acceptor molecules used in the transglycosylation reactions conducted with rXynSOS and/or its glycosynthase variant rXynSOS-E236G.

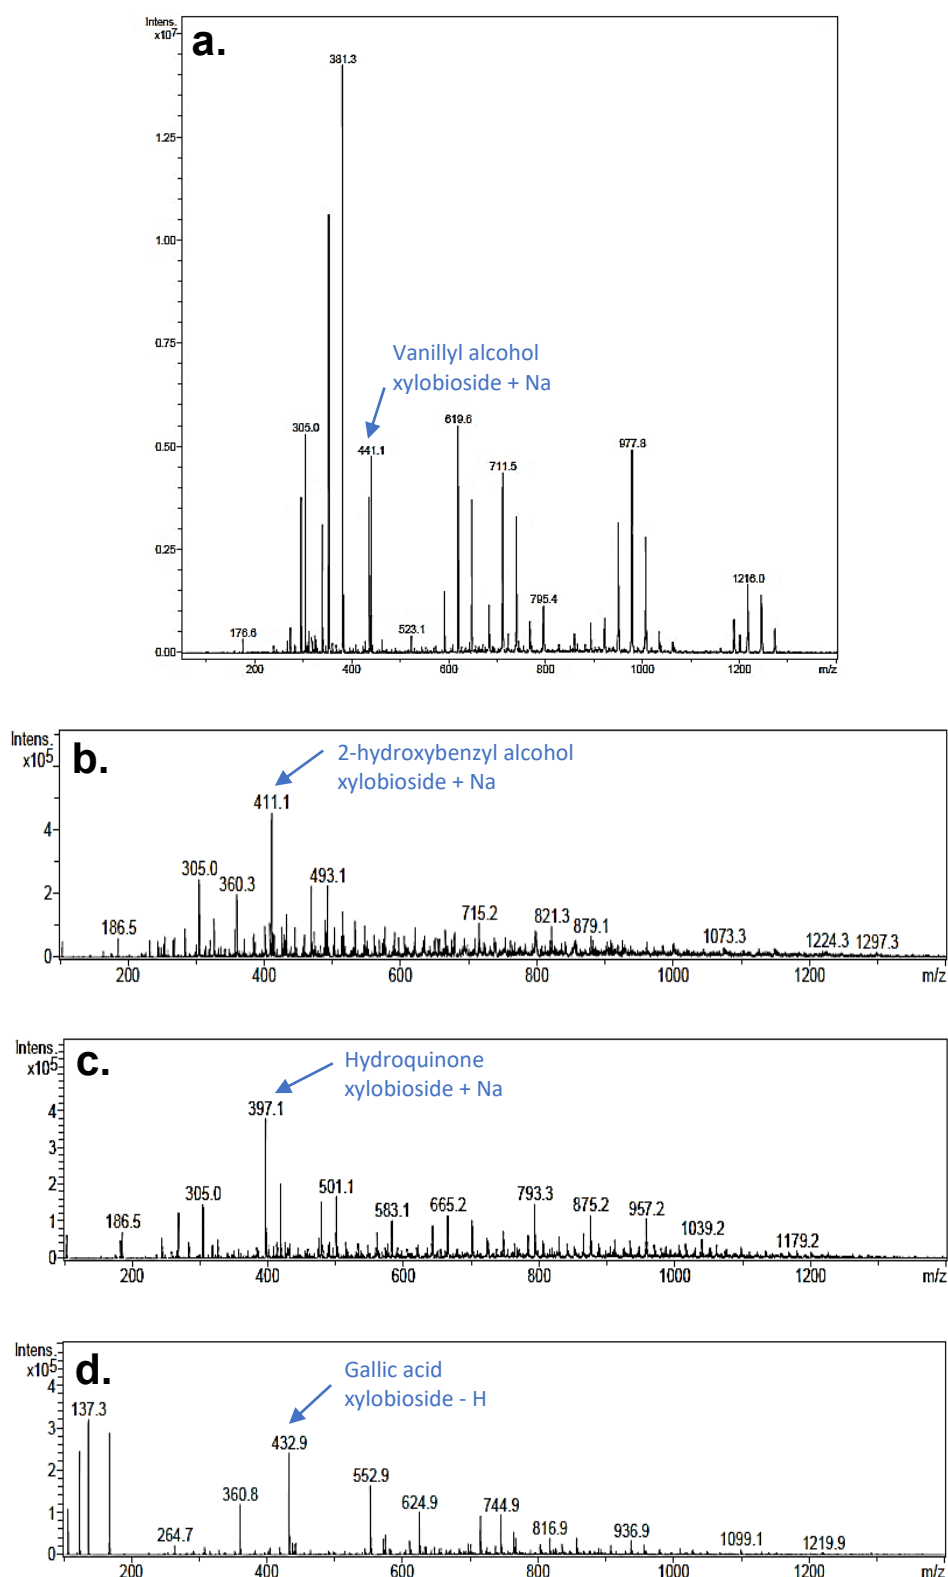

**Figure S5.** ESI-MS spectra of the transglycosylation reactions conducted by rXynSOS for 1 h at 50 °C and 1,200 rpm in 50 mM sodium acetate buffer pH 5 with different acceptor molecules at 20 mM and 0.1% (w/v) *p*NPX<sub>2</sub> as xylobiose donor (100  $\mu$ L). Blue arrows show the adducts of the following glycosides: a) vanillyl alcohol; b) 2-hydroxybenzyl alcohol; c) hydroquinone and d) gallic acid.

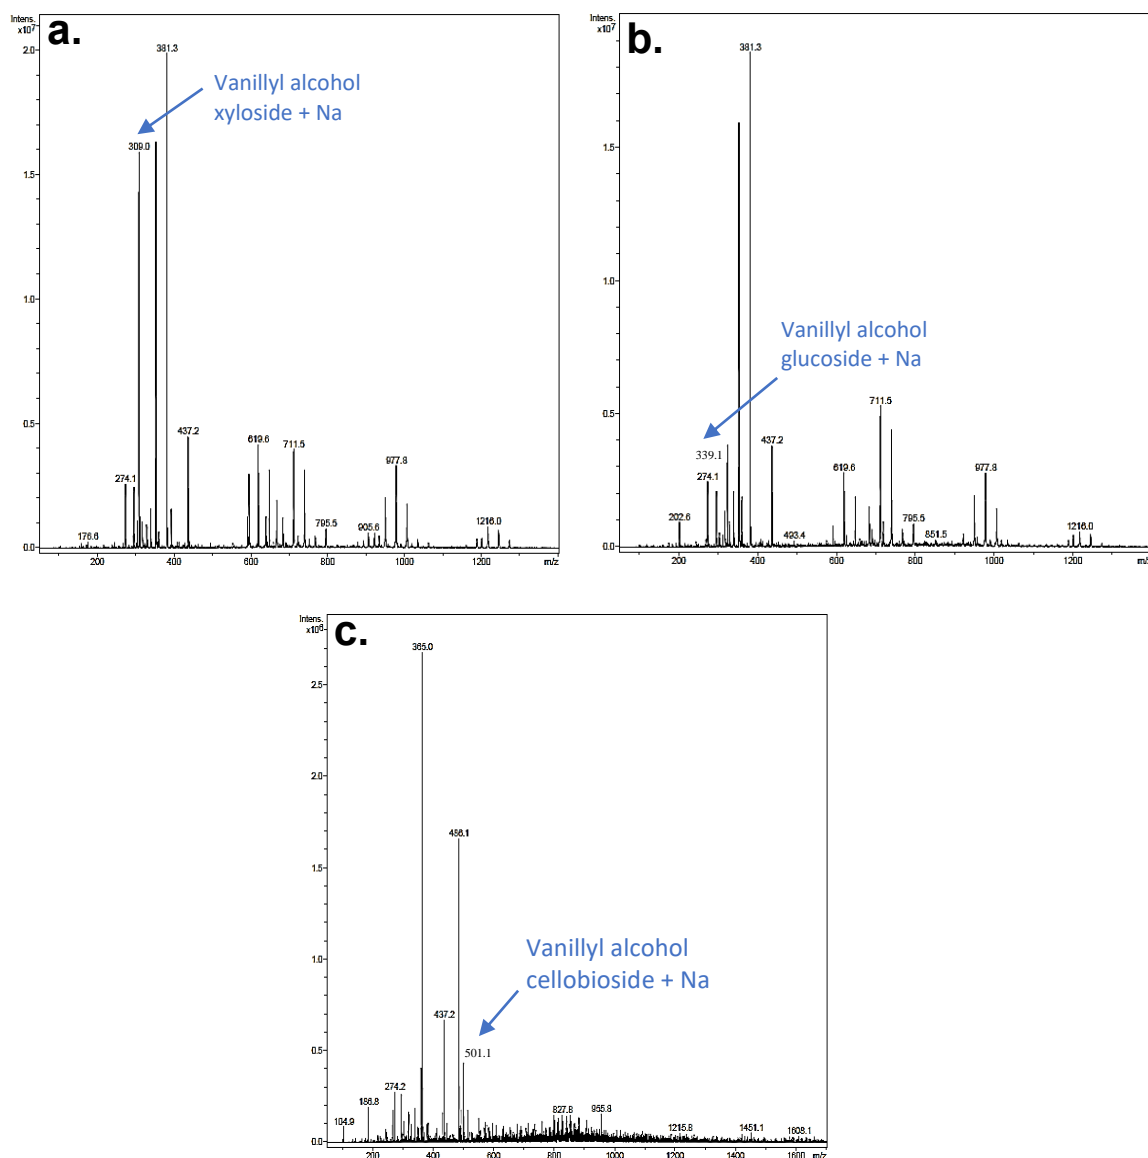

**Figure S6.** ESI-MS spectra of the transglycosylation reactions conducted by rXynSOS for 1 h at 50 °C and 1,200 rpm in 50 mM sodium acetate buffer pH 5 with different sugar donors at 0.1% (w/v) and 20 mM vanillyl alcohol as acceptor (100  $\mu$ L). Blue arrows indicate the Na-adducts of vanillyl alcohol glycosides obtained with a) *p*NPX as xylose donor; b) *p*NPG as glucose donor and c) *p*NPG<sub>2</sub> as cellobiose donor.



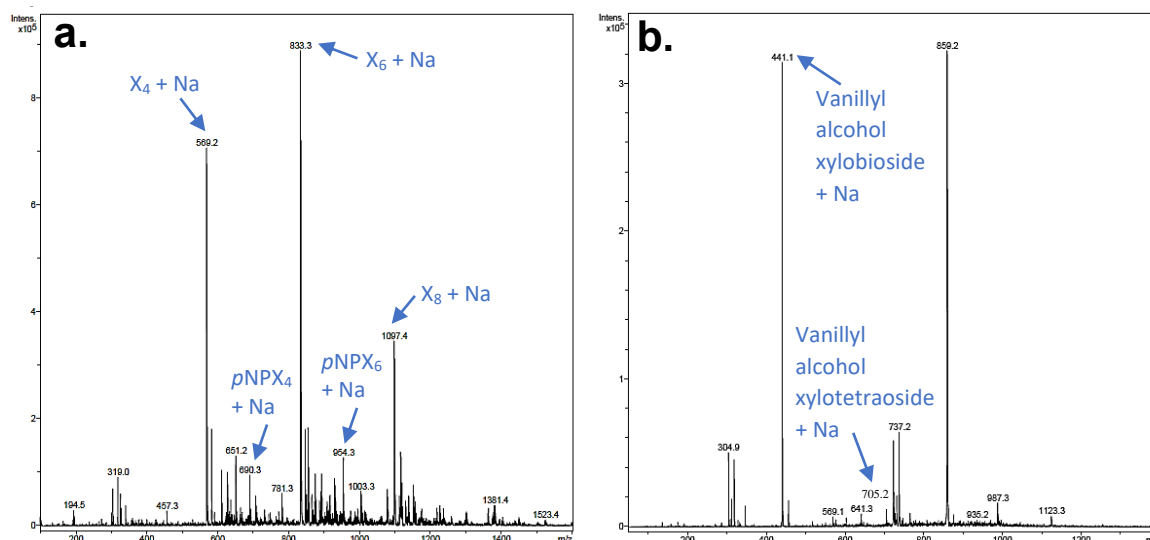

**Figure S8.** ESI-MS spectra of the glycosylation reactions conducted by rXynSOS-E236G glycosynthase variant for 16 h at 25 °C and 500 rpm in 50 mM sodium acetate buffer pH 5 using 20 mM X<sub>2</sub>F as xylobiose donor and 20 mM *p*NPX<sub>2</sub> and vanillyl alcohol as acceptors (100 µL). Blue arrows indicate the Na-adducts of the following glycosides: a) *p*NPX<sub>2</sub> and b) vanillyl alcohol. XOS of different lengths (X<sub>4</sub>, X<sub>6</sub> and X<sub>8</sub>) were detected in the *p*NPX<sub>2</sub> reaction a).

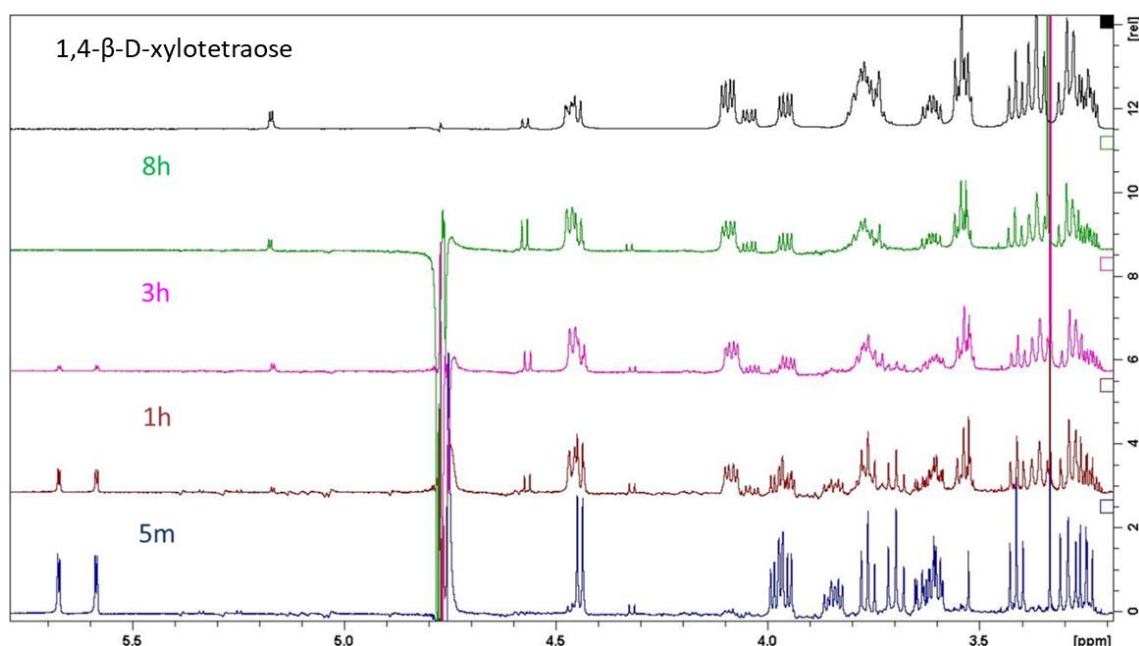

**Figure S9.** NMR spectra of the XOS synthesis reaction over time. A reaction mixture (200  $\mu$ L) containing 4 mg/mL XynSOS-E236G in 50 mM sodium acetate buffer pH 5 was prepared in a NMR tube. The tube was introduced in the spectrometer and 25 mM xylobiose-fluoride ( $X_2F$ ) were added. Series of 1D- $^1H$  experiments were then acquired at 298 K at different time points between 5 min and 8 h. The figure displays the spectra of the XOS synthesis reaction acquired after 5 min, 1 h, 3 h and 8 h of  $X_2F$  addition and compares them with the spectrum of a sample of commercial 1,4- $\beta$ -D-xylotetraose. NMR spectra of the monitored reaction in all time points match the one of 1,4- $\beta$ -D-xylotetraose, confirming the  $\beta$ -1,4 regioselectivity of rXynSOS-E236G glycosynthase variant in XOS synthesis. The dd signal at 5.6 ppm corresponding to H 1 proton coupled with F of  $X_2F$  substrate disappeared with time and new signals appeared corresponding to longer xylobioside oligomers with  $\beta$ -1,4 glycosidic bonds.

**Table S1.** Synthesis of oligosaccharides by rXynSOS-E236G glycosynthase variant in reactions (100  $\mu$ L) conducted for 16 h at 25  $^{\circ}C$  and 500 rpm in 50 mM sodium acetate buffer pH 5 using 20 mM XF,  $G_2F$  and GF as xylose, cellobiose and glucose only reactant molecules, respectively. Oligosaccharides were detected by ESI-MS in the positive mode as Na-adducts.

| Oligosaccharide             | ESI-MS (m/z Na-adduct mass) | Intensity |
|-----------------------------|-----------------------------|-----------|
| XF as reactant molecule     |                             |           |
| $X_2$                       | 304.2                       | 245307    |
| $X_3$                       | 437.2                       | 345614    |
| $X_4$                       | 569.5                       | 203035    |
| $G_2F$ as reactant molecule |                             |           |
| $G_4$                       | 689.2                       | 471410    |
| GF as reactant molecule     |                             |           |
| Not detected                | -                           | -         |



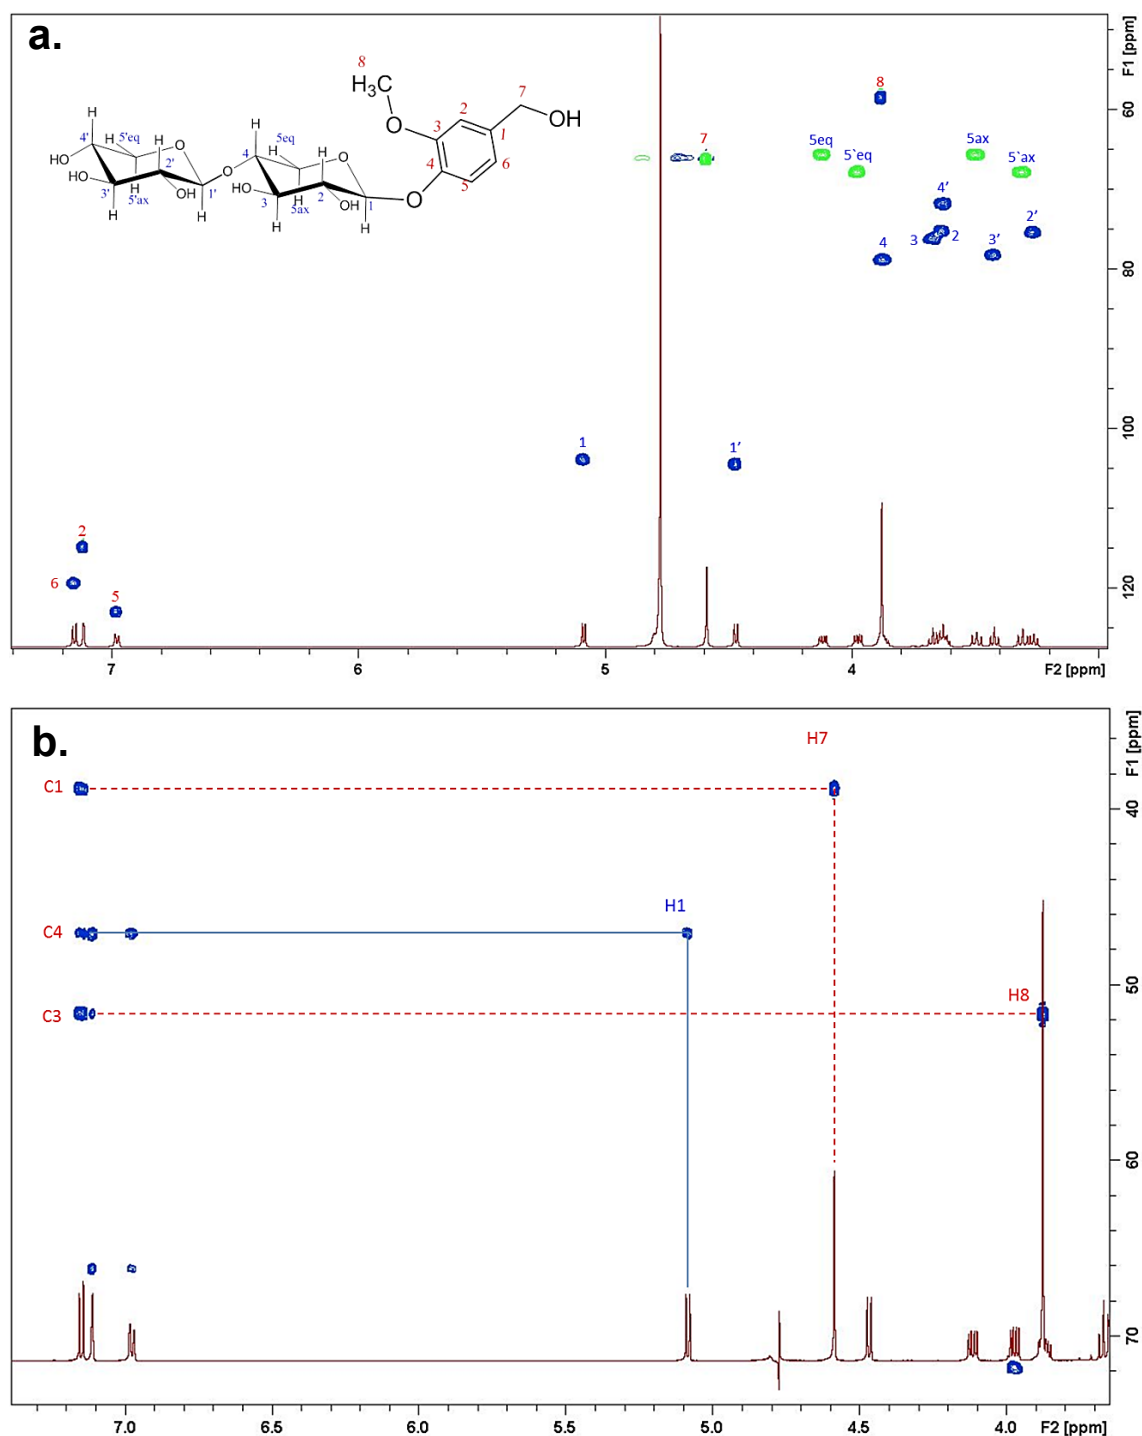

**Figure S10.** NMR spectra of vanillyl alcohol xylobioside dissolved in deuterated water ( $\text{D}_2\text{O}$ ). a) Superimposition of  $^1\text{H}$  zg (cherry) and  $^1\text{H}$ - $^{13}\text{C}$  HSQC (blue/green) spectra and assignment, xylobiose (blue), vanillyl alcohol (red). b) Superimposition of HMBC (blue) and  $^1\text{H}$  zgpr (cherry) spectra. The long range  $^1\text{H}$ - $^{13}\text{C}$  correlations showing the connectivity between the xylobiose and vanillyl alcohol are highlighted, disclosing a 4-vanillyl alcohol xylobioside. The HMBC spectrum was acquired with a spectral window of 100 ppm centered at 80 ppm. The peaks of the aromatic carbons appear folded in the upper part of the spectrum shifted 100 ppm.

**Table S2.** Chemical shifts for vanillyl alcohol xylobioside dissolved in deuterated water (D<sub>2</sub>O). Chemical shifts were referenced to the residual water signal set at 4.77 ppm at 298 K.

|                     | <sup>1</sup> H (ppm) | <sup>13</sup> C (ppm) |
|---------------------|----------------------|-----------------------|
| 1 X <sub>2</sub>    | 5.08                 | 103.5                 |
| 2 X <sub>2</sub>    | 3.6                  | 75.2                  |
| 3 X <sub>2</sub>    | 3.67                 | 76.0                  |
| 4 X <sub>2</sub>    | 3.8                  | 78.7                  |
| 5 ax X <sub>2</sub> | 3.49                 | 65.5                  |
| 5 eq X <sub>2</sub> | 4.1                  | 65.68                 |
| 1' X <sub>2</sub>   | 4.46                 | 104.49                |
| 2' X <sub>2</sub>   | 3.26                 | 75.3                  |
| 3' X <sub>2</sub>   | 3.4                  | 78.18                 |
| 4' X <sub>2</sub>   | 3.6                  | 71.7                  |
| 5'ax X <sub>2</sub> | 3.3                  | 67.67                 |
| 5'eq X <sub>2</sub> | 3.97                 | 67.6                  |

|              | <sup>1</sup> H (ppm) | <sup>13</sup> C (ppm) |
|--------------|----------------------|-----------------------|
| <b>1 Van</b> |                      | 138.7*                |
| <b>2 Van</b> | 7.11                 | 114.9                 |
| <b>3 Van</b> |                      | 151.6*                |
| <b>4 Van</b> |                      | 147.2*                |
| <b>5 Van</b> | 6.9                  | 123.0                 |
| <b>6 Van</b> | 7.15                 | 126.8                 |
| <b>7 Van</b> | 4.58                 | 66.14                 |
| <b>8 Van</b> | 3.87                 | 58.37                 |

\*Assignments derived from HMBC spectrum

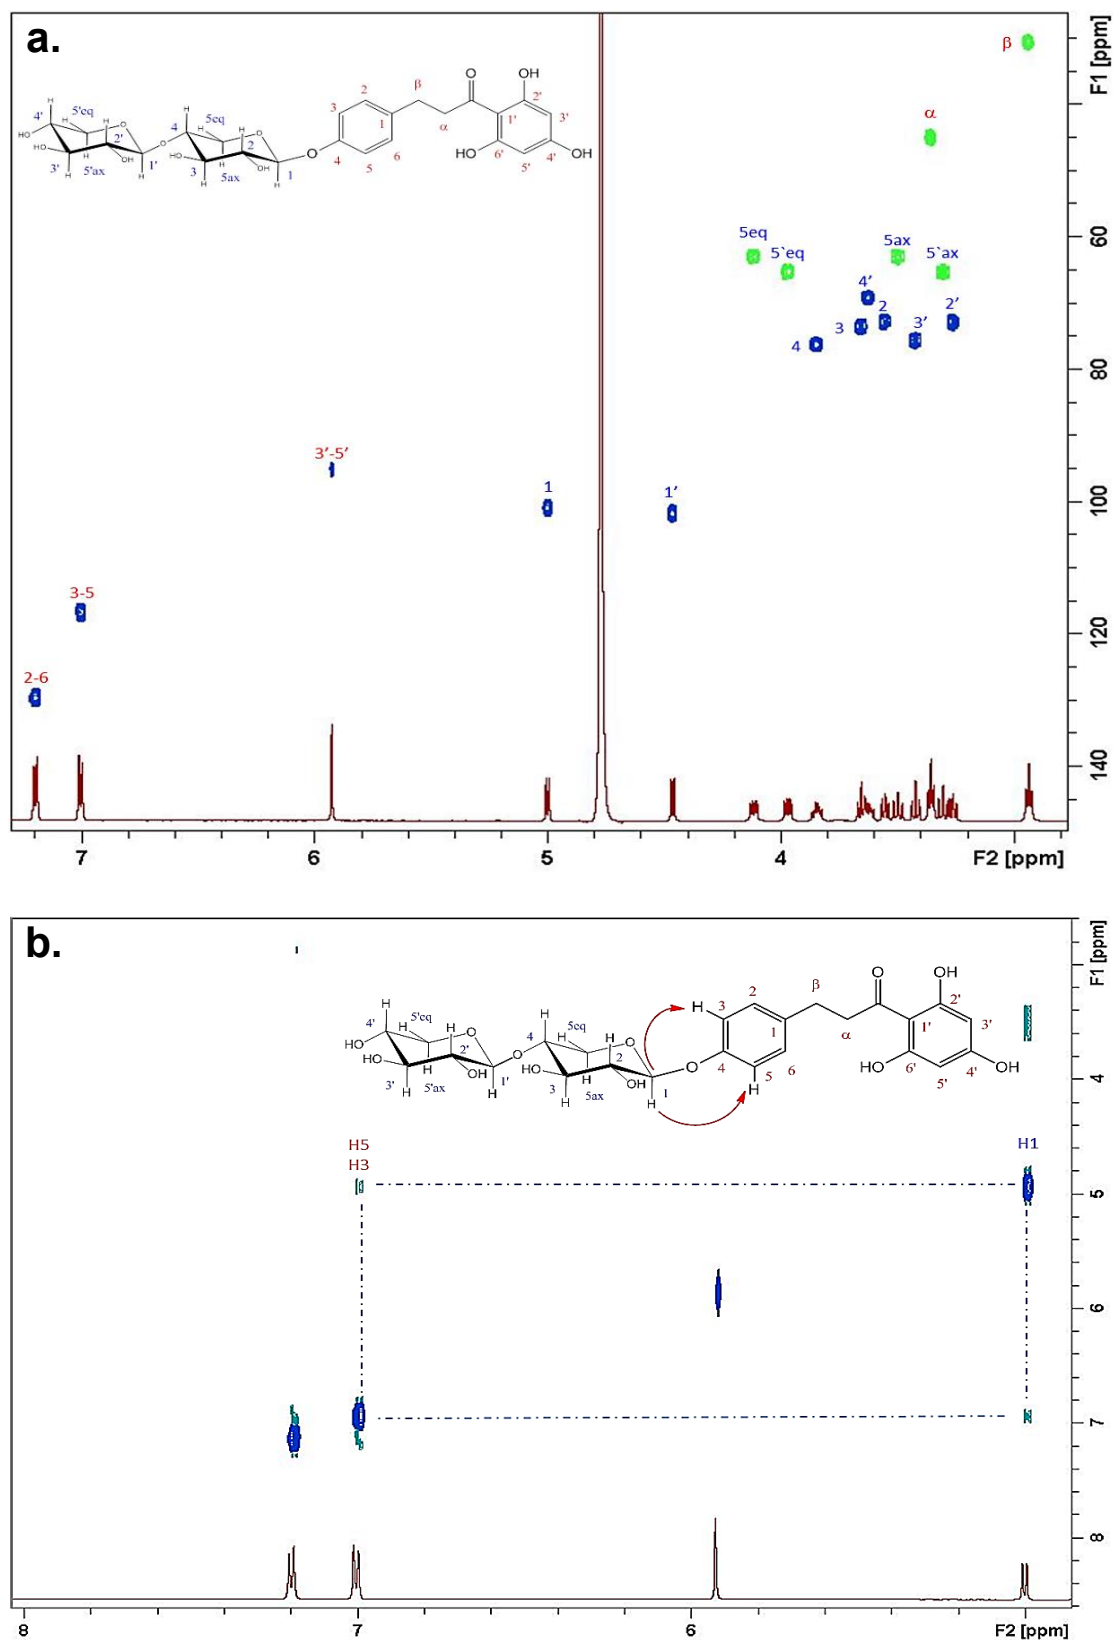

**Figure S11.** NMR spectra of phloretin xylobioside dissolved in deuterated water ( $D_2O$ ). a) Superimposition of  $^1H$  zg (cherry) and  $^1H$ - $^{13}C$  HSQC (blue/green) spectra and assignment, xylobiose (blue), phloretin (red). b) Superimposition of ROESY (blue and green) and  $^1H$  zg (cherry) spectra with highlighted ROE correlation between xylobiose  $^1H$  1 and  $^1H$  3 and 5 of phloretin, rendering a 4-phloretin xylobioside.

**Table S3.** Chemical shifts for phloretin xylobioside dissolved in deuterated water (D<sub>2</sub>O). Chemical shifts were referenced to the residual water signal set at 4.77 ppm at 298 K.

|                     | <sup>1</sup> H (ppm) | <sup>13</sup> C (ppm) |
|---------------------|----------------------|-----------------------|
| 1 X <sub>2</sub>    | 5.0                  | 100.97                |
| 2 X <sub>2</sub>    | 3.55                 | 72.81                 |
| 3 X <sub>2</sub>    | 3.65                 | 73.58                 |
| 4 X <sub>2</sub>    | 3.84                 | 76.21                 |
| 5 ax X <sub>2</sub> | 3.49                 | 63.11                 |
| 5 eq X <sub>2</sub> | 4.12                 | 62.97                 |
| 1' X <sub>2</sub>   | 4.46                 | 101.78                |
| 2' X <sub>2</sub>   | 3.26                 | 72.87                 |
| 3' X <sub>2</sub>   | 3.42                 | 75.67                 |
| 4' X <sub>2</sub>   | 3.62                 | 69.27                 |
| 5'ax X <sub>2</sub> | 3.3                  | 65.33                 |
| 5'eq X <sub>2</sub> | 3.97                 | 65.32                 |

|               | <sup>1</sup> H (ppm) | <sup>13</sup> C (ppm) |
|---------------|----------------------|-----------------------|
| 1 Phlor       |                      | 135.4*                |
| 2 (6) Phlor   | 7.19                 | 129.66                |
| 3 (5) Phlor   | 7.01                 | 116.71                |
| 4 Phlor       |                      | 154.6*                |
| α Phlor       | 2.93                 | 30.69                 |
| β Phlor       | 3.35                 | 44.9                  |
| C=O Phlor     |                      | 206*                  |
| 1' Phlor      |                      | 104*                  |
| 2' (6') Phlor |                      | 163.5*                |
| 3' (5') Phlor | 5.93                 | 95.21                 |
| 4' Phlor      |                      | 163.5*                |

\*Assignments derived from HMBC spectrum



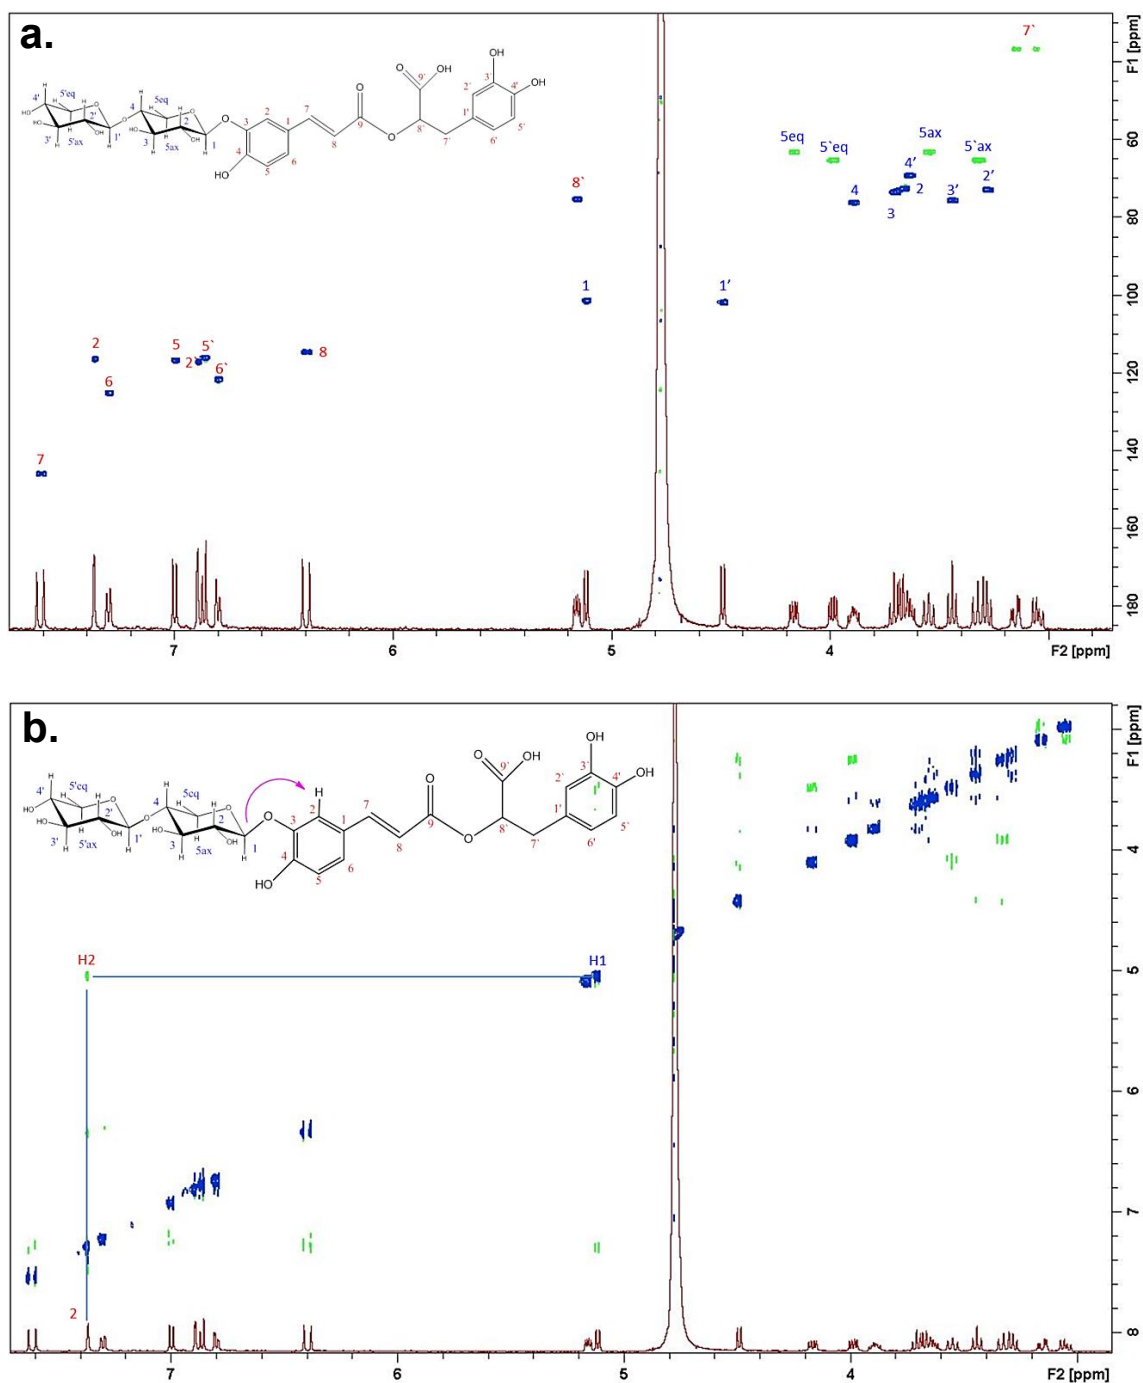

**Figure S13.** NMR spectra of rosmarinic acid xylobioside (2) dissolved in deuterated water (D<sub>2</sub>O). a) Superimposition of <sup>1</sup>H zg (cherry) and <sup>1</sup>H-<sup>13</sup>C HSQC (blue/green) spectra and assignment, xylobiose (blue), rosmarinic acid (red). b) Superimposition of ROESY (blue and green) and <sup>1</sup>H zg (cherry) spectra with highlighted ROE correlation between <sup>1</sup>H 1 and <sup>1</sup>H 2 of rosmarinic acid (blue line), rendering a 3-rosmarinic acid xylobioside.

**Table S4.** Chemical shifts for rosmarinic acid xylobiosides (1) and (2) dissolved in deuterated water (D<sub>2</sub>O). Chemical shifts were referenced to the residual water signal set at 4.77 ppm at 298K.

| Rosmarinic acid xylobioside (1) |                      |                       | Rosmarinic acid xylobioside (2) |                      |                       |
|---------------------------------|----------------------|-----------------------|---------------------------------|----------------------|-----------------------|
|                                 | <sup>1</sup> H (ppm) | <sup>13</sup> C (ppm) |                                 | <sup>1</sup> H (ppm) | <sup>13</sup> C (ppm) |
| 1 X <sub>2</sub>                | 5.12                 | 100.5                 | 1 X <sub>2</sub>                | 5.11                 | 101.4                 |
| 2 X <sub>2</sub>                | 3.66                 | 72.2                  | 2 X <sub>2</sub>                | 3.66                 | 62.6                  |
| 3 X <sub>2</sub>                | 3.7                  | 73.1                  | 3 X <sub>2</sub>                | 3.7                  | 73.5                  |
| 4 X <sub>2</sub>                | 3.9                  | 75.7                  | 4                               | 3.89                 | 76.0                  |
| 5 ax X <sub>2</sub>             | 3.56                 | 64.8                  | 5 ax X <sub>2</sub>             | 3.5                  | 63.1                  |
| 5 eq X <sub>2</sub>             | 4.17                 | 62.6                  | 5 eq X <sub>2</sub>             | 4.16                 | 63.3                  |
| 1' X <sub>2</sub>               | 4.49                 | 101.5                 | 1' X <sub>2</sub>               | 4.5                  | 101.7                 |
| 2' X <sub>2</sub>               | 3.2                  | 72.2                  | 2' X <sub>2</sub>               | 3.2                  | 72.8                  |
| 3' X <sub>2</sub>               | 3.4                  | 75.1                  | 3' X <sub>2</sub>               | 3.4                  | 75.4                  |
| 4' X <sub>2</sub>               | 3.6                  | 68.9                  | 4' X <sub>2</sub>               | 3.6                  | 69.0                  |
| 5'ax X <sub>2</sub>             | 3.33                 | 64.6                  | 5'ax X <sub>2</sub>             | 3.3                  | 65.1                  |
| 5'eq X <sub>2</sub>             | 4.0                  | 64.8                  | 5'eq X <sub>2</sub>             | 3.99                 | 65.1                  |
| 1 Rosm                          |                      | 129.5*                | 1 Rosm                          |                      | 126.81*               |
| 2 Rosm                          | 7.13                 | 122.2                 | 2 Rosm                          | 7.36                 | 116.6                 |
| 3 Rosm                          |                      | 145.5*                | 3 Rosm                          |                      | 144.13*               |
| 4 Rosm                          |                      | 146.4*                | 4 Rosm                          |                      | 148.2*                |
| 5 Rosm                          | 7.13                 | 116.2                 | 5 Rosm                          | 6.99                 | 116.6                 |
| 6 Rosm                          | 7.18                 | 115.5                 | 6 Rosm                          | 7.3                  | 125.12                |
| 7 Rosm                          | 7.57                 | 146                   | 7 Rosm                          | 7.6                  | 145.8                 |
| 8 Rosm                          | 6.4                  | 115.4                 | 8 Rosm                          | 6.39                 | 114.6                 |
| 9 Rosm                          |                      | 168.3*                | 9 Rosm                          |                      | 168.4*                |
| 1' Rosm                         |                      | 129.1*                | 1' Rosm                         |                      | 128.9*                |
| 2' Rosm                         | 6.89                 | 117.3                 | 2' Rosm                         | 6.89                 | 117.0                 |
| 3' Rosm                         |                      | 143*                  | 3' Rosm                         |                      | 143.4*                |
| 4' Rosm                         |                      | 143.8*                | 4' Rosm                         |                      | 142.8                 |
| 5' Rosm                         | 6.79                 | 121.8                 | 5' Rosm                         | 6.8                  | 116.0                 |
| 6' Rosm                         | 6.79                 | 121.8                 | 6' Rosm                         | 6.8                  | 121.5                 |
| 7' Rosm                         | 3.1                  | 35.8                  | 7' Rosm                         | 3.14                 | 36.7                  |
| 7' Rosm                         | 3.2                  | 35.8                  | 7' Rosm                         | 3.04                 | 36.7                  |
| 8' Rosm                         | 5.2                  | 74.4                  | 8' Rosm                         | 5.1                  | 75.2                  |
| 9' Rosm                         |                      | 175.0*                | 9' Rosm                         |                      | 175.8*                |

\*Assignments derived from HMBC spectrum
